# Supplementary material for: Moisture-saturated zeolites – A new strategy for releasing nitric oxide
Source: Royal Society of Chemistry journal article supplement (doi:10.1039/c0nj00445f), 2010-01-01
Supplement: c0nj00445f.pdf [file c0nj00445f.pdf]

## Supporting Information

### Moisture-saturated zeolites – A new strategy for releasing nitric oxide

Feng Wei, Jia Yuan Yang, Qian Hou, Jian Hua Zhu\*

Key Laboratory of Mesoscopic Chemistry of MOE, School of Chemistry and Chemical  
Engineering, Nanjing University, Nanjing 210093, China Fax: +86-25-83317761; Tel:  
+86-25-83595848; E-mail: [jhzhu@netra.nju.edu.cn](mailto:jhzhu@netra.nju.edu.cn)

### Contents

Table S1 The acid induced release of  $\text{NO}_x^a$  from NaY zeolite in various conditions

Table S2 Decomposition of  $\text{NaNO}_2$  in acid solution under various conditions

Figure S1.  $\text{NO}_x$ -TPD curves on the zeolite NaY adsorbed NO and stored under ambient conditions for different weeks.

Table S1 The acid induced release of NO<sub>x</sub><sup>a</sup> from NaY zeolite in various conditions

| Sample                                                               | NaY     |      |      |      | Control |   |
|----------------------------------------------------------------------|---------|------|------|------|---------|---|
| V/m (cm <sup>3</sup> g <sup>-1</sup> )                               | 500     | 333  | 500  | 333  | /       |   |
| pH value                                                             | 1.2     | 1.2  | 1.0  | 1.0  | 1.2     |   |
| NO <sub>x</sub> released in acid<br>solution (μmol g <sup>-1</sup> ) | 30 min  | 0.28 | 0.23 | 0.52 | 0.47    | 0 |
|                                                                      | 60 min  | 0.11 | 0.17 | 0.29 | 0.29    | 0 |
|                                                                      | 90 min  | 0.11 | 0.13 | 0.23 | 0.18    | / |
|                                                                      | 120 min | 0.11 | 0.13 | 0.06 | 0.06    | / |
|                                                                      | Total   | 0.62 | 0.67 | 1.10 | 1.00    | 0 |
| Desorption proportion (%) <sup>b</sup>                               | 5.54    | 5.98 | 9.82 | 8.93 | /       |   |

<sup>a</sup> The test was performed at 310 K, and the sample desorbed the NO<sub>x</sub> of 11.20 μmol g<sup>-1</sup> in TPD process.

<sup>b</sup> This value is the ratio of NO<sub>x</sub> released in acid solution to that desorbed in TPD test.

Table S2 Decomposition of NaNO<sub>2</sub> in acid solution under various conditions

| Temperature of acid solution                           |           | 310   |       |       | 298   |       |
|--------------------------------------------------------|-----------|-------|-------|-------|-------|-------|
| (K)                                                    |           |       |       |       |       |       |
| pH value                                               |           | 1.0   | 1.2   | 7.0   | 1.2   | 7.0   |
| NO <sub>x</sub> released in<br>acid solution<br>(μmol) | 30 min    | 0.078 | 0.072 | 0.005 | 0.040 | 0.003 |
|                                                        | 60 min    | 0.060 | 0.055 | 0.005 | 0.037 | 0.002 |
|                                                        | 90 min    | 0.038 | 0.042 | 0.005 | 0.030 | 0.002 |
|                                                        | 120 min   | 0.025 | 0.027 | 0.006 | 0.022 | 0     |
|                                                        | Total (A) | 0.201 | 0.195 | 0.021 | 0.129 | 0.007 |
| Desorbed proportion (%)<br>(A/0.254) <sup>a</sup>      |           | 79.1  | 76.8  | 8.3   | 50.8  | 2.8   |
| [NO <sub>2</sub> <sup>-</sup> ] (μmol)                 |           | 0.104 | 0.110 | 0.512 | 0.238 | 0.515 |

<sup>a</sup> Theoretic amount of NO<sub>x</sub> detected from thorough decomposition of NaNO<sub>2</sub> is 0.254 μmol.

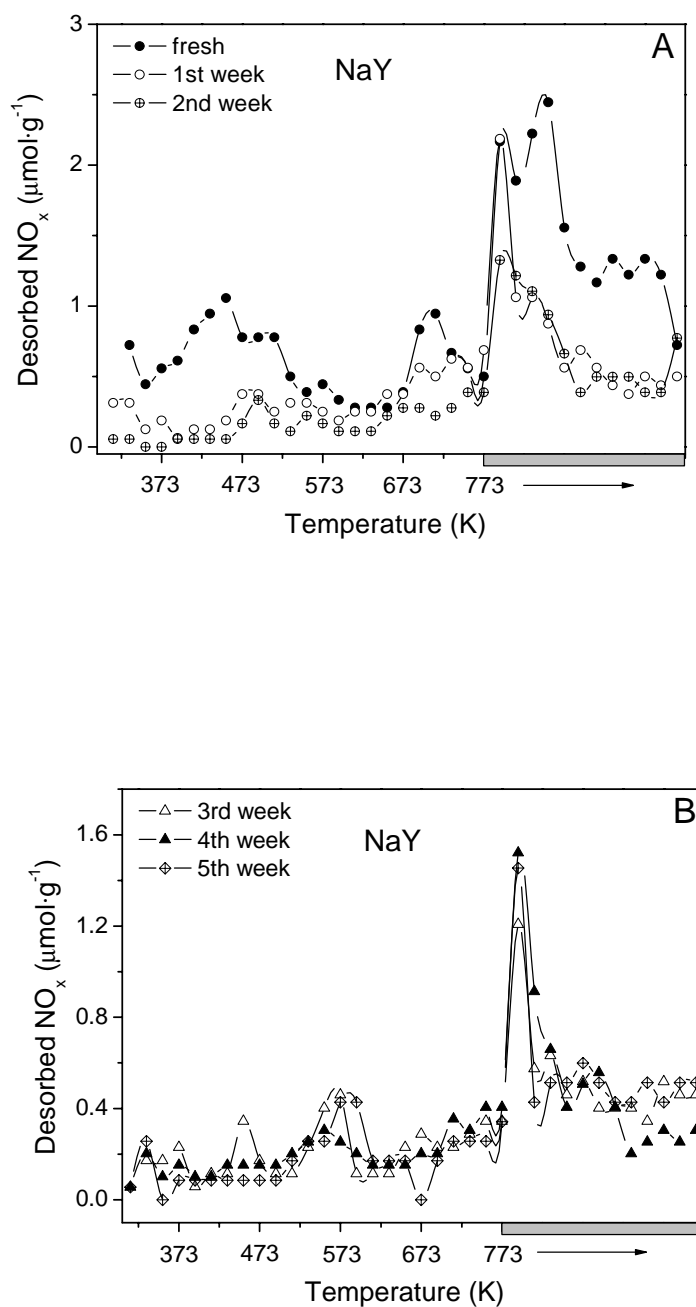

Figure S1 NO<sub>x</sub>-TPD curves on the zeolite NaY adsorbed NO and stored under ambient conditions for different weeks.
